# Supplementary material
Source: Springer Nature journal article supplement (https://www.springermedizin.de/resource/supplementary/13256_2012_2195_MOESM1_ESM.pdf/9649214)

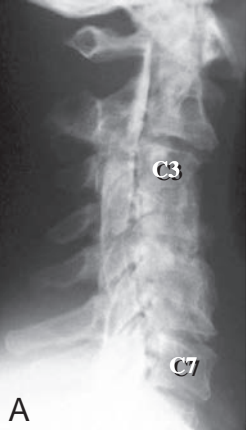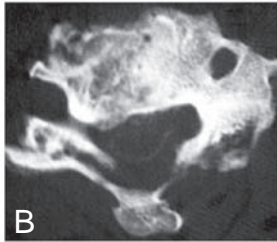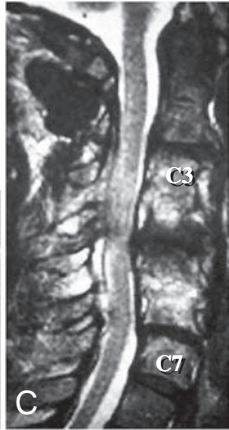

Supplement: MOESM1 [file 9649214]
